# Supplementary material
Source: Research Square preprint supplement (doi:10.21203/rs.3.rs-8755908/v1)
Supplement: Supplementary file 1 [file 92b4037cd6b2ba5ea5adda5b.docx]

Highlights

- A novel Gen-AI MCDA framework integrating multi-LLMs and human.
- Captures bias, loss aversion, and nonlinear risk via Prospect & Utility Theory.
- Introduces dual-layer ranking: Risk-adjusted Utility and Performance Equilibrium.
- Validated via a treatment assessment case study with expert–LLM consensus.
- Ensures explainable, robust, and fair decision-making across complex scenarios.
